# Supplementary material
Source: PubMed Central journal article supplement (PMC4158406)

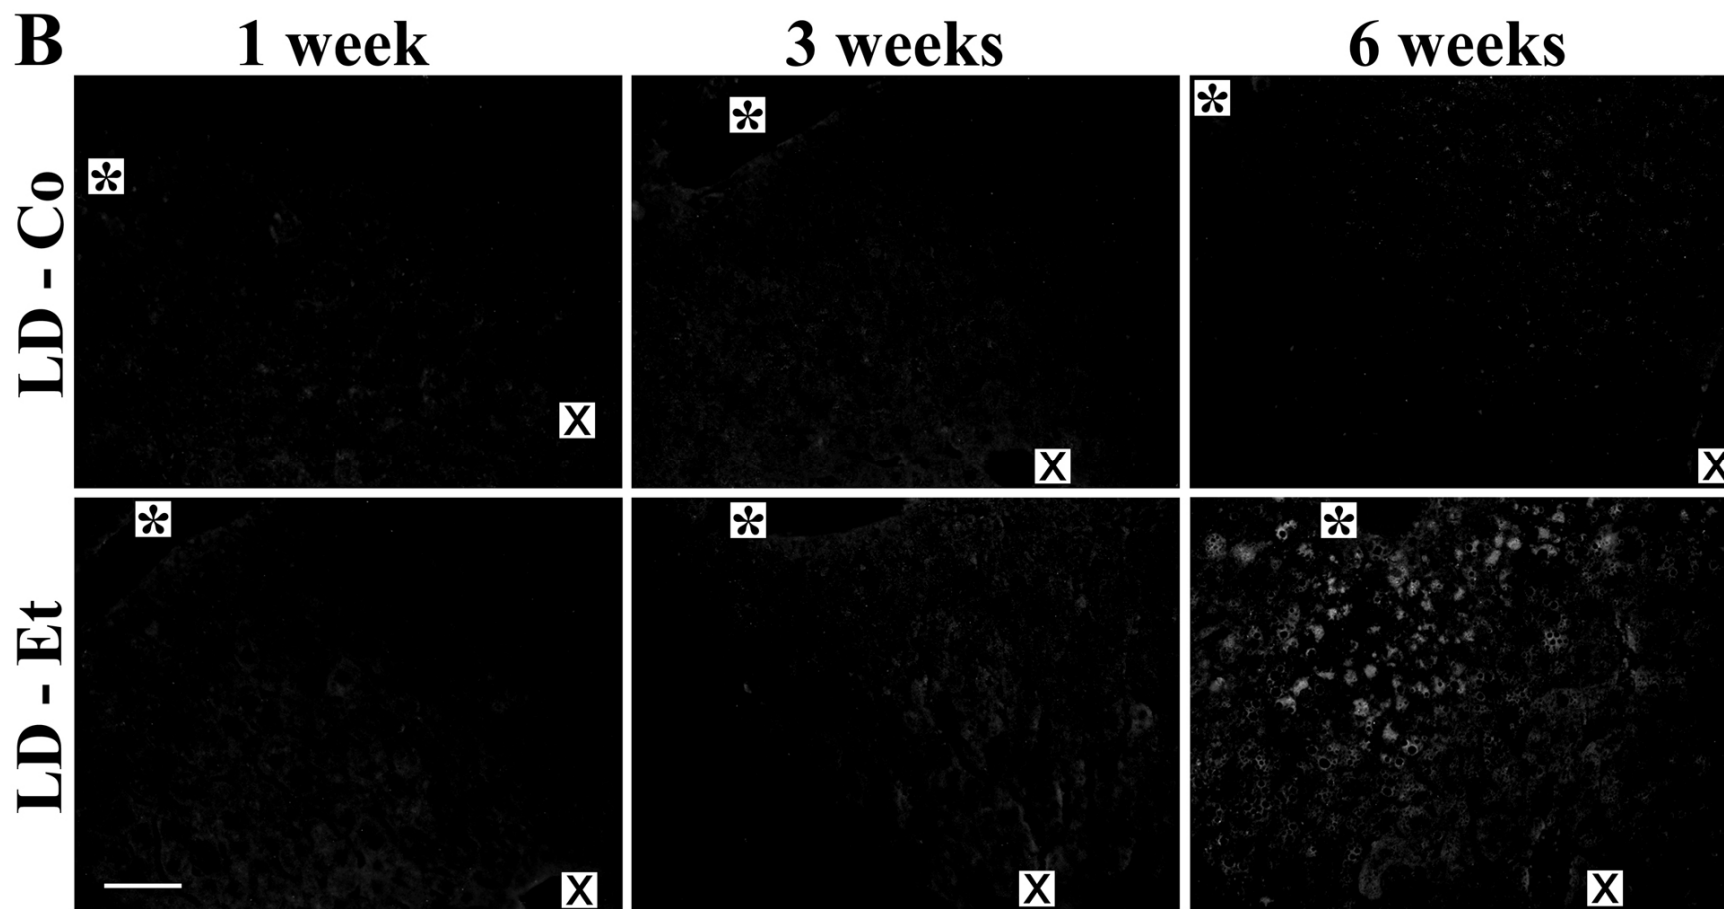

Supplemental Figure 10

Supplement: NIHMS605819-supplement-Supplementary_Figure_10_.pdf [file NIHMS605819-supplement-Supplementary_Figure_10_.pdf]

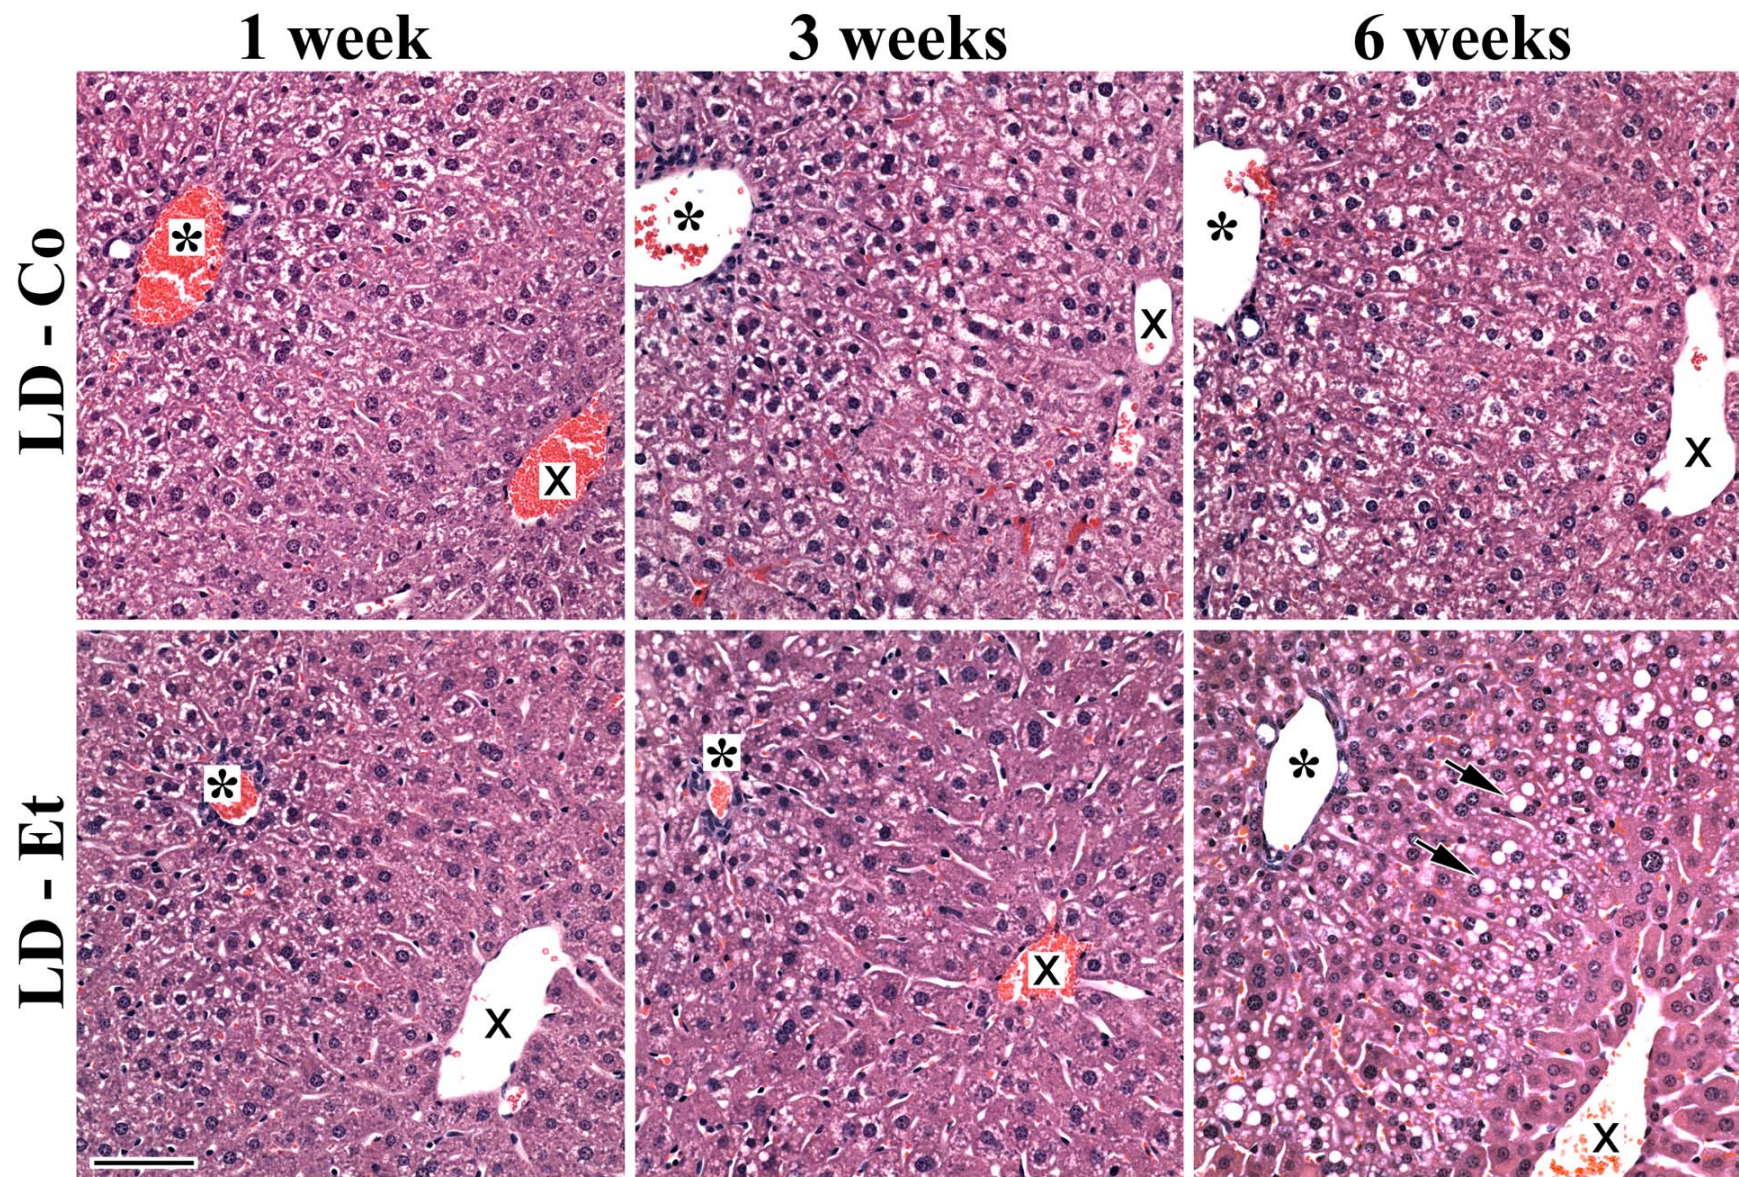

Supplemental Figure 1

Supplement: NIHMS605819-supplement-Supplementary_Figure_1_.pdf [file NIHMS605819-supplement-Supplementary_Figure_1_.pdf]

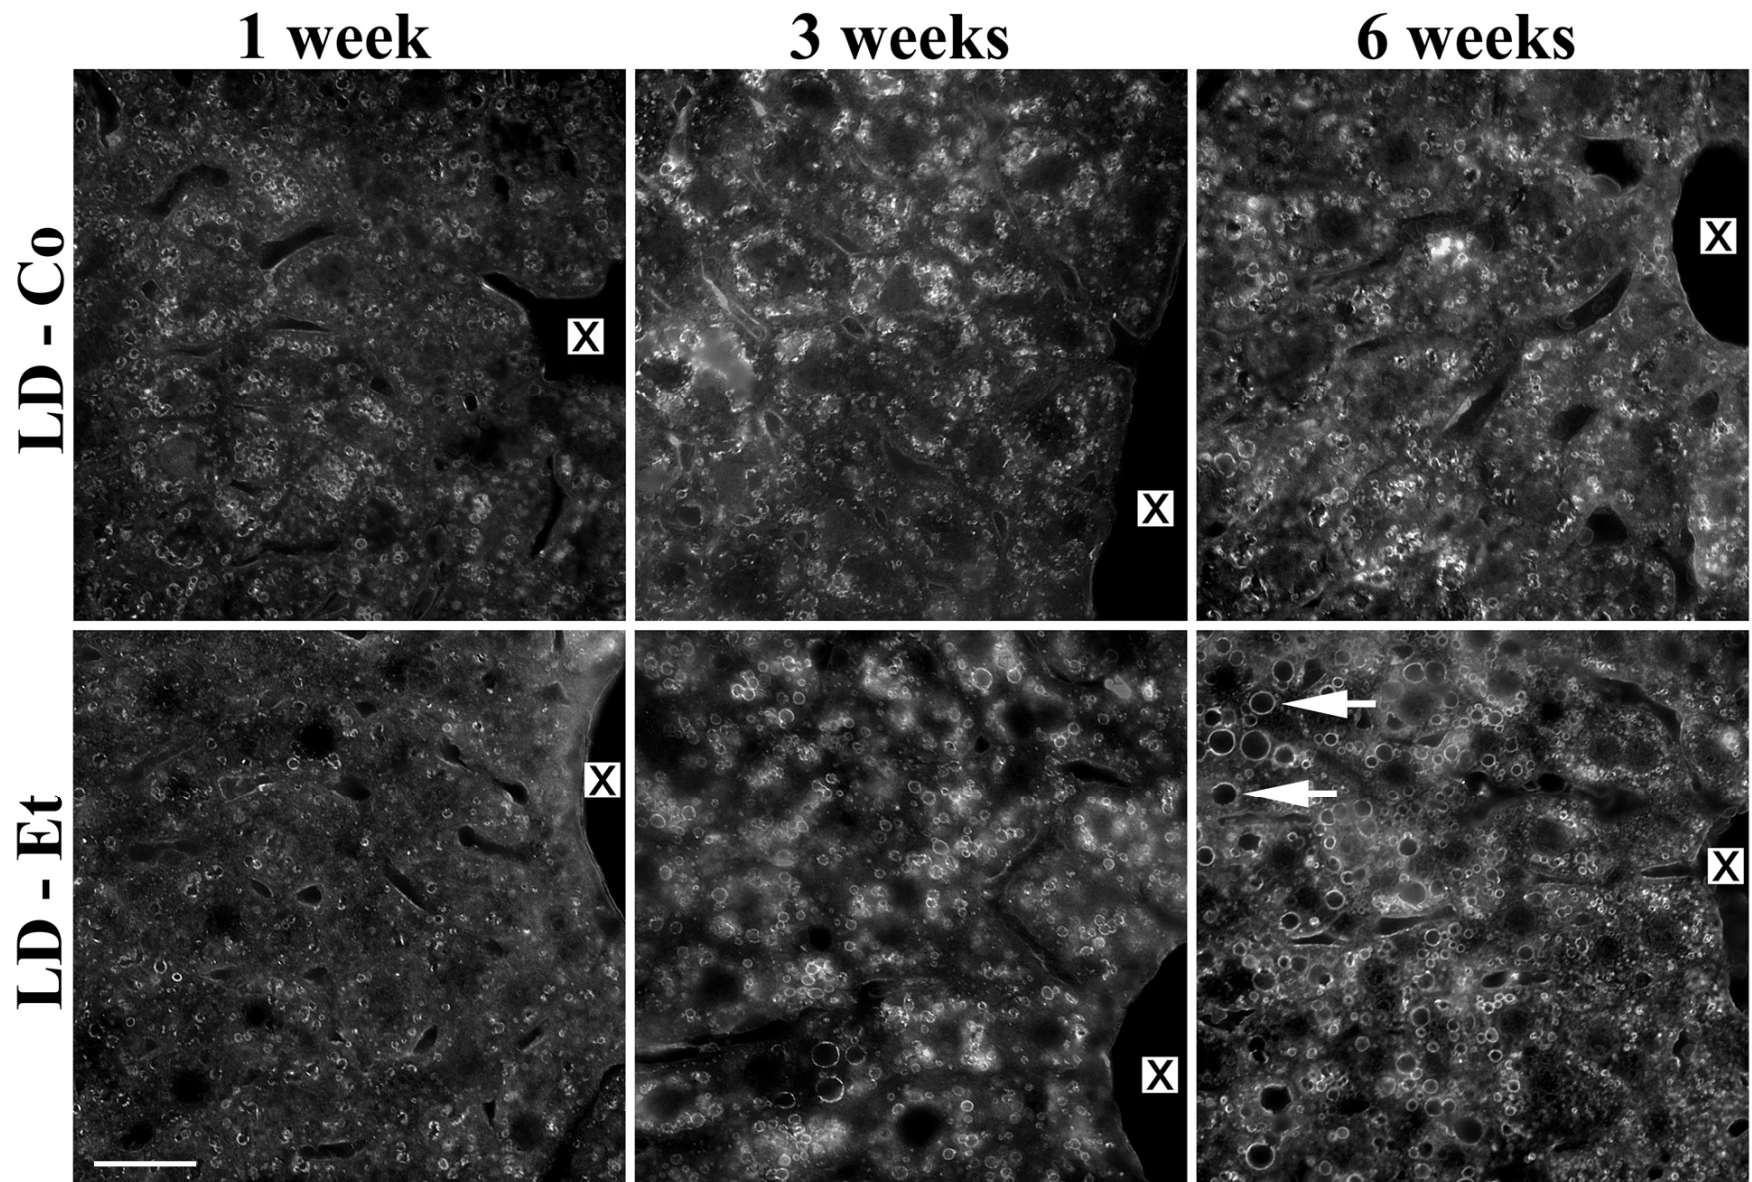

Supplemental Figure 2

Supplement: NIHMS605819-supplement-Supplementary_Figure_2_.pdf [file NIHMS605819-supplement-Supplementary_Figure_2_.pdf]

**Uterus Stn Co**

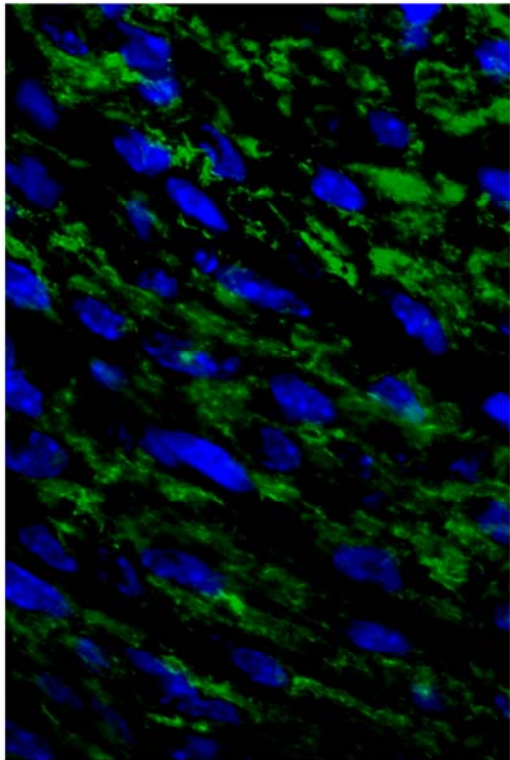

**LD-Co 6 wk**

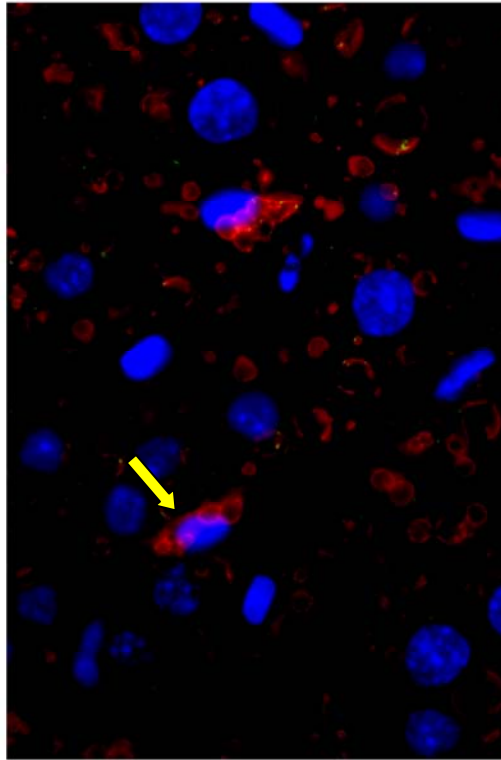

**LD-Et 6 wk**

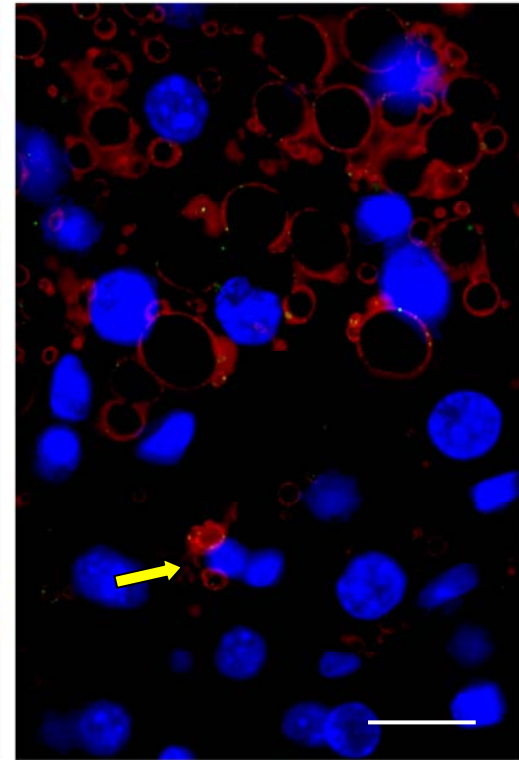

Supplemental Figure 3

Supplement: NIHMS605819-supplement-Supplementary_Figure_3_.pdf [file NIHMS605819-supplement-Supplementary_Figure_3_.pdf]

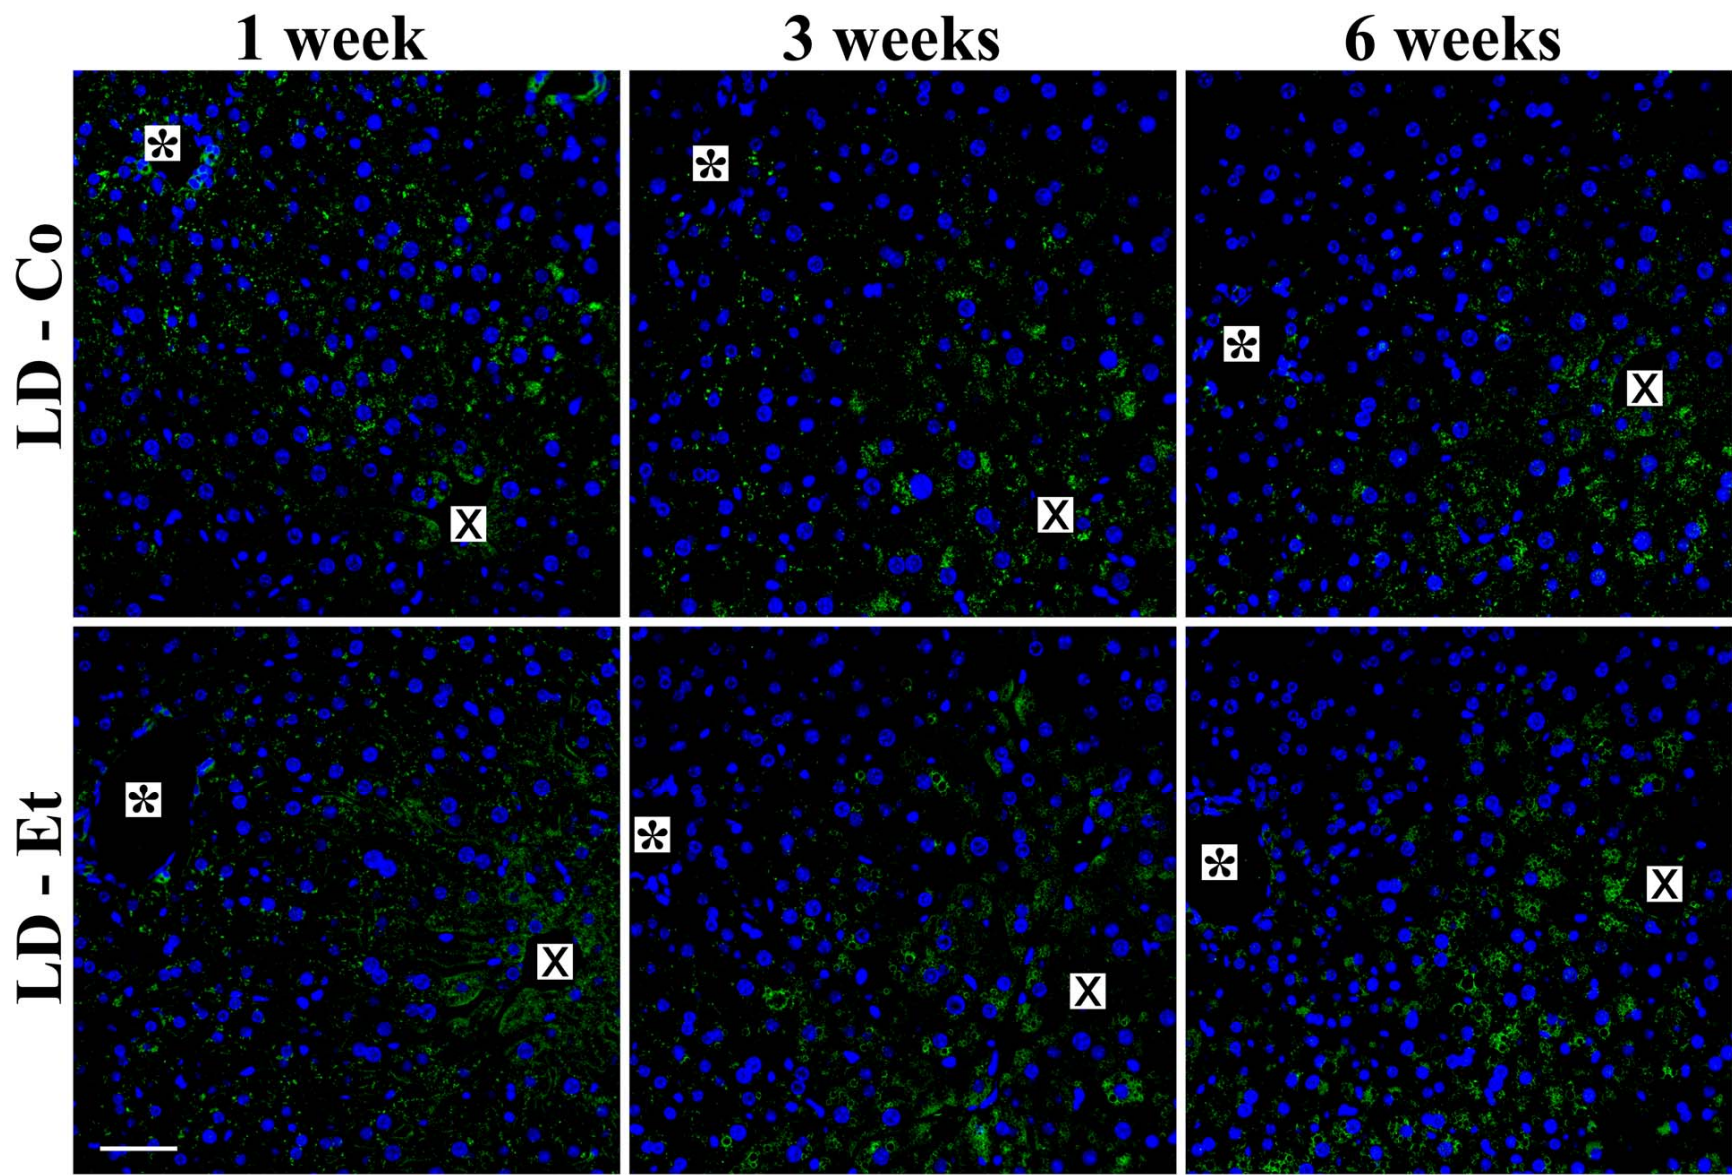

Supplemental Figure 4

Supplement: NIHMS605819-supplement-Supplementary_Figure_4_.pdf [file NIHMS605819-supplement-Supplementary_Figure_4_.pdf]

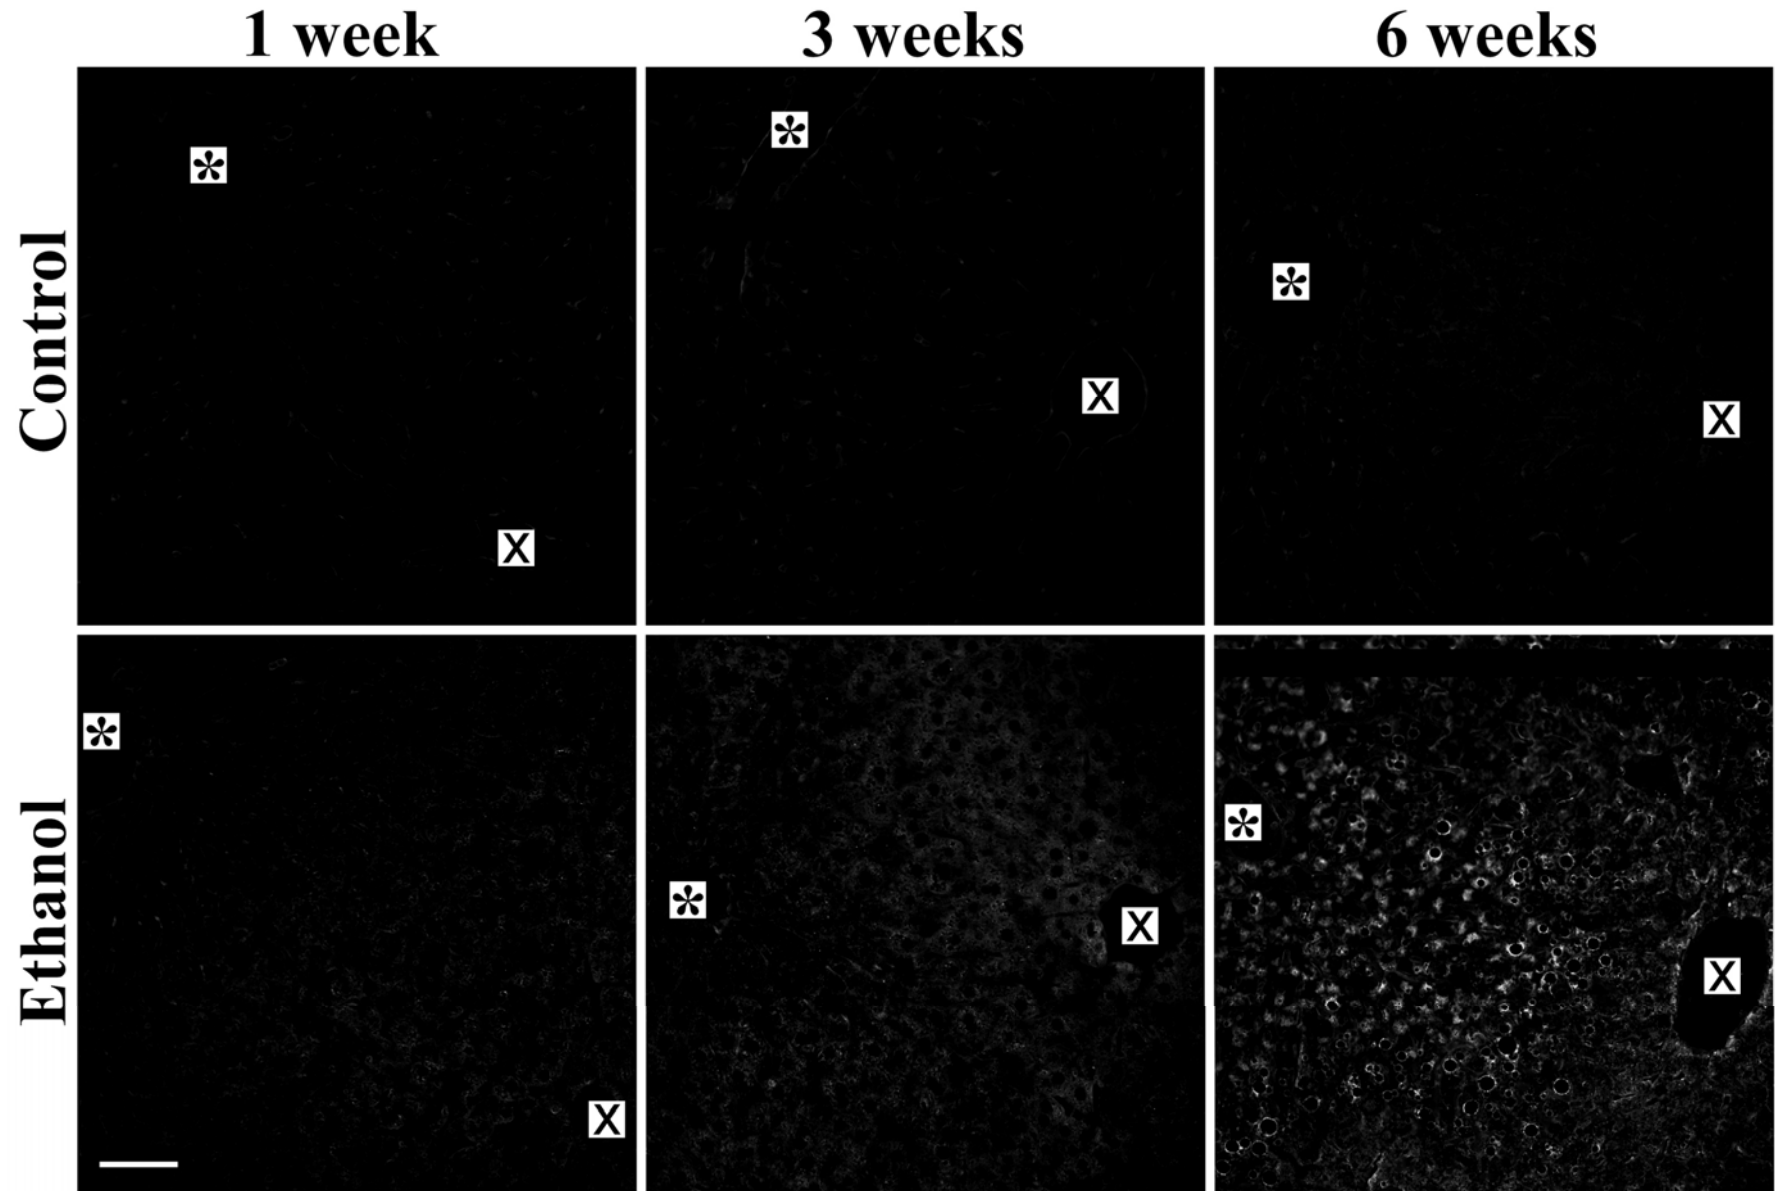

Supplemental Figure 5

Supplement: NIHMS605819-supplement-Supplementary_Figure_5_.pdf [file NIHMS605819-supplement-Supplementary_Figure_5_.pdf]

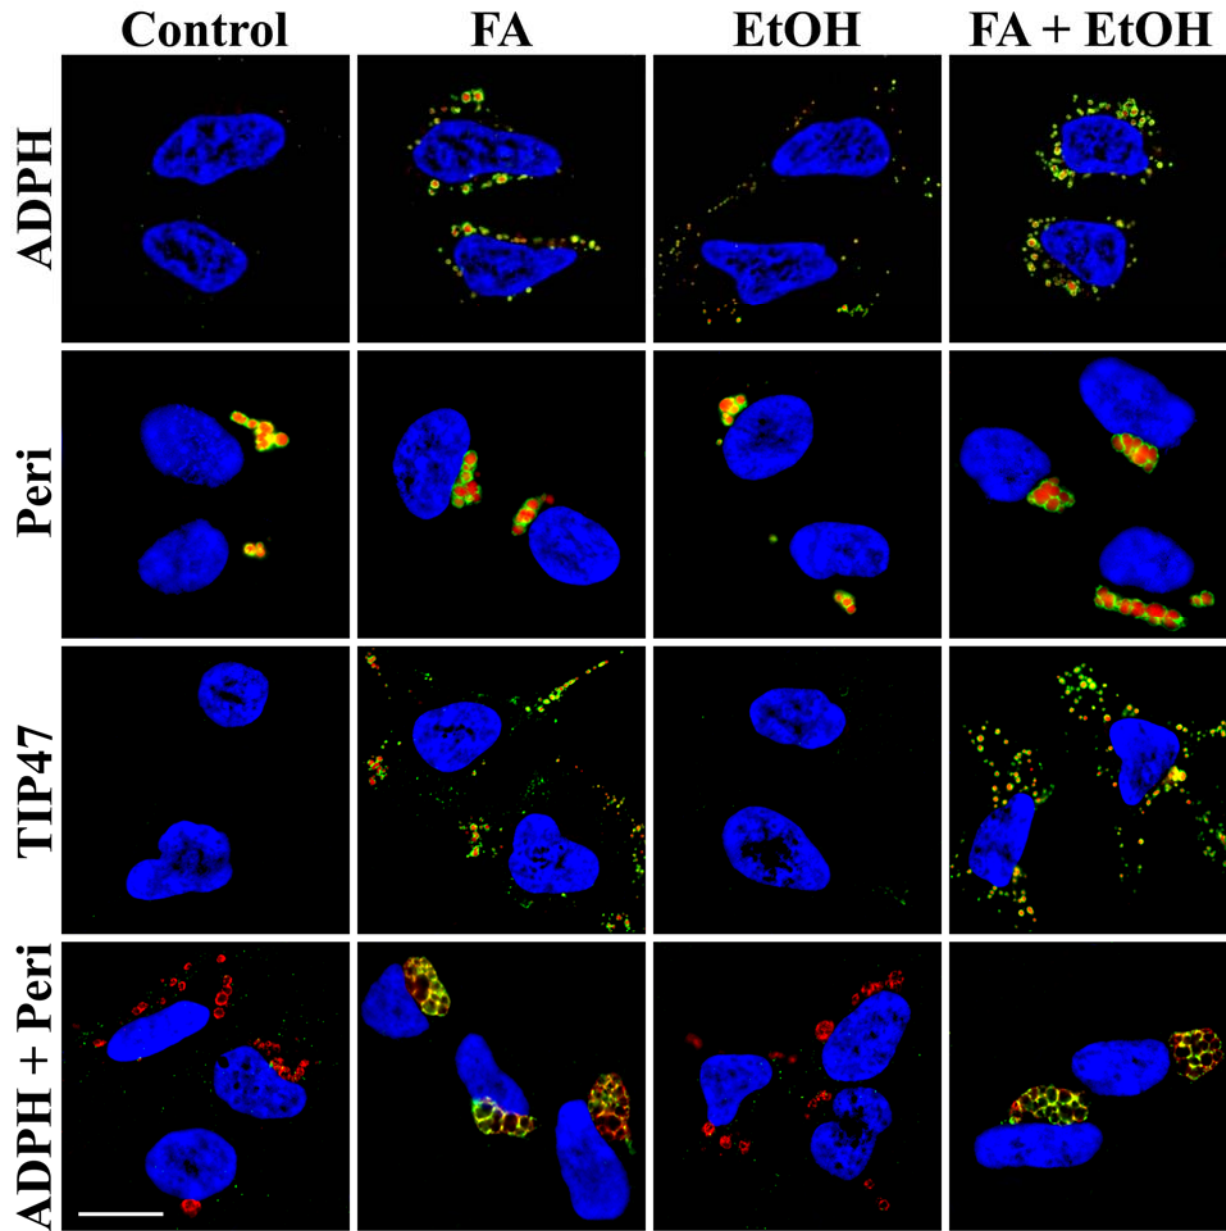

Supplemental Figure 6

Supplement: NIHMS605819-supplement-Supplementary_Figure_6_.pdf [file NIHMS605819-supplement-Supplementary_Figure_6_.pdf]

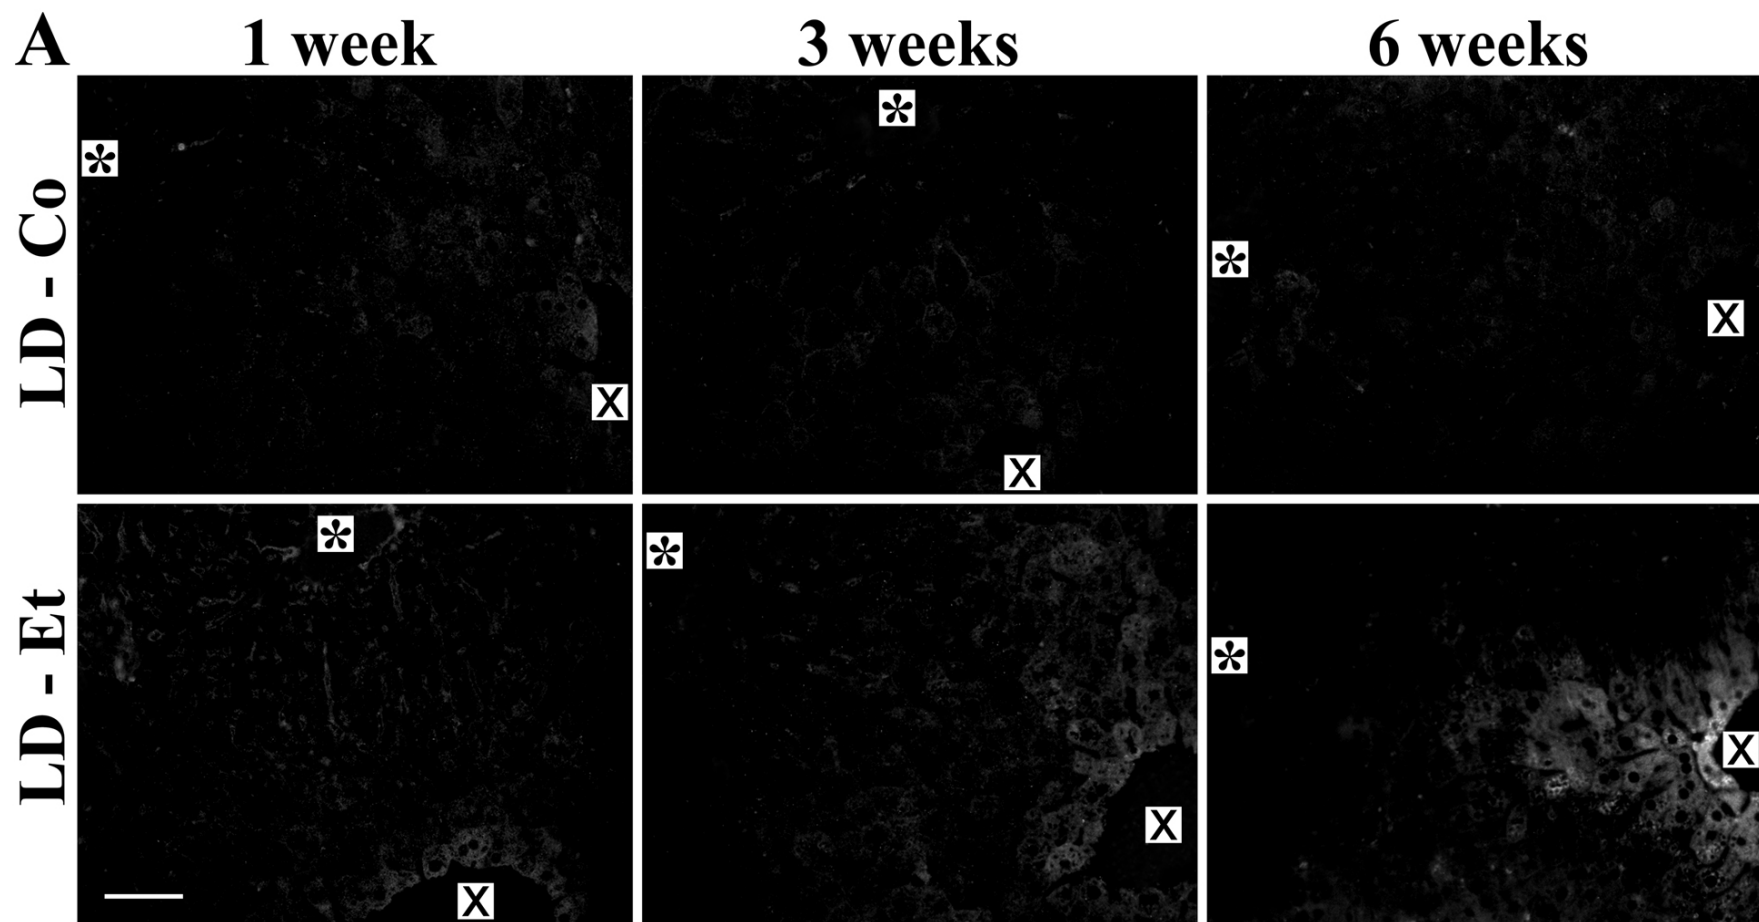

Supplemental Figure 7

Supplement: NIHMS605819-supplement-Supplementary_Figure_7_.pdf [file NIHMS605819-supplement-Supplementary_Figure_7_.pdf]

**B**

**1 week**

**3 weeks**

**6 weeks**

**LD - C0**

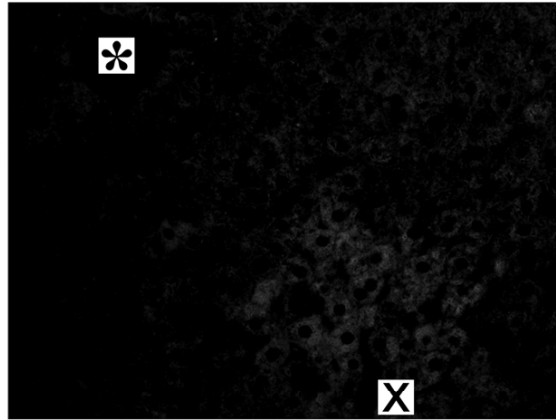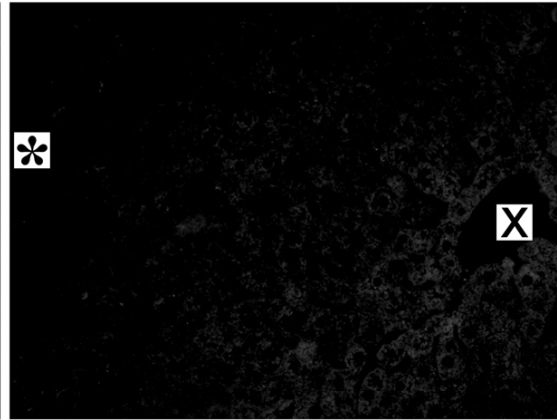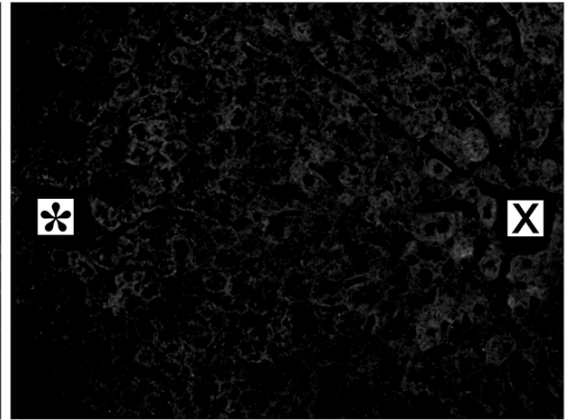

**LD - Et**

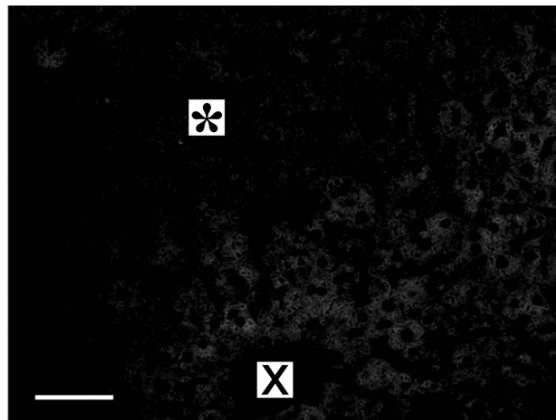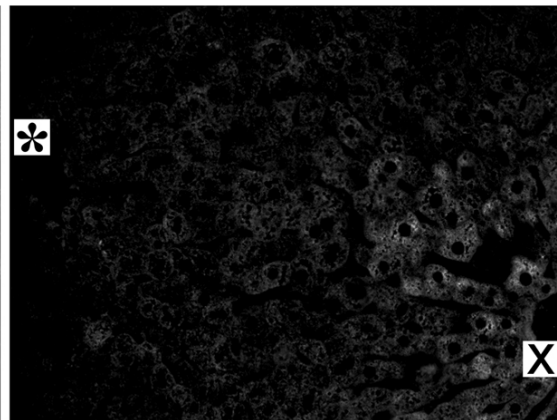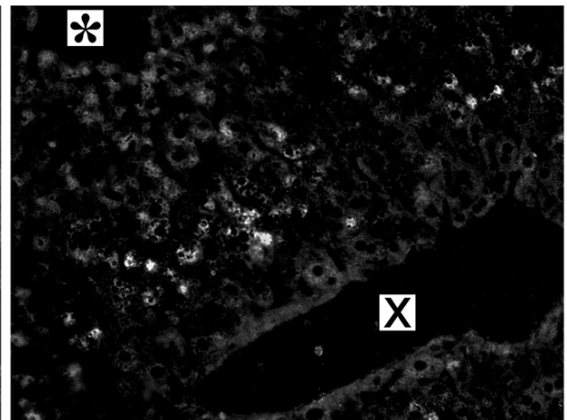

Supplemental Figure 8

Supplement: NIHMS605819-supplement-Supplementary_Figure_8_.pdf [file NIHMS605819-supplement-Supplementary_Figure_8_.pdf]

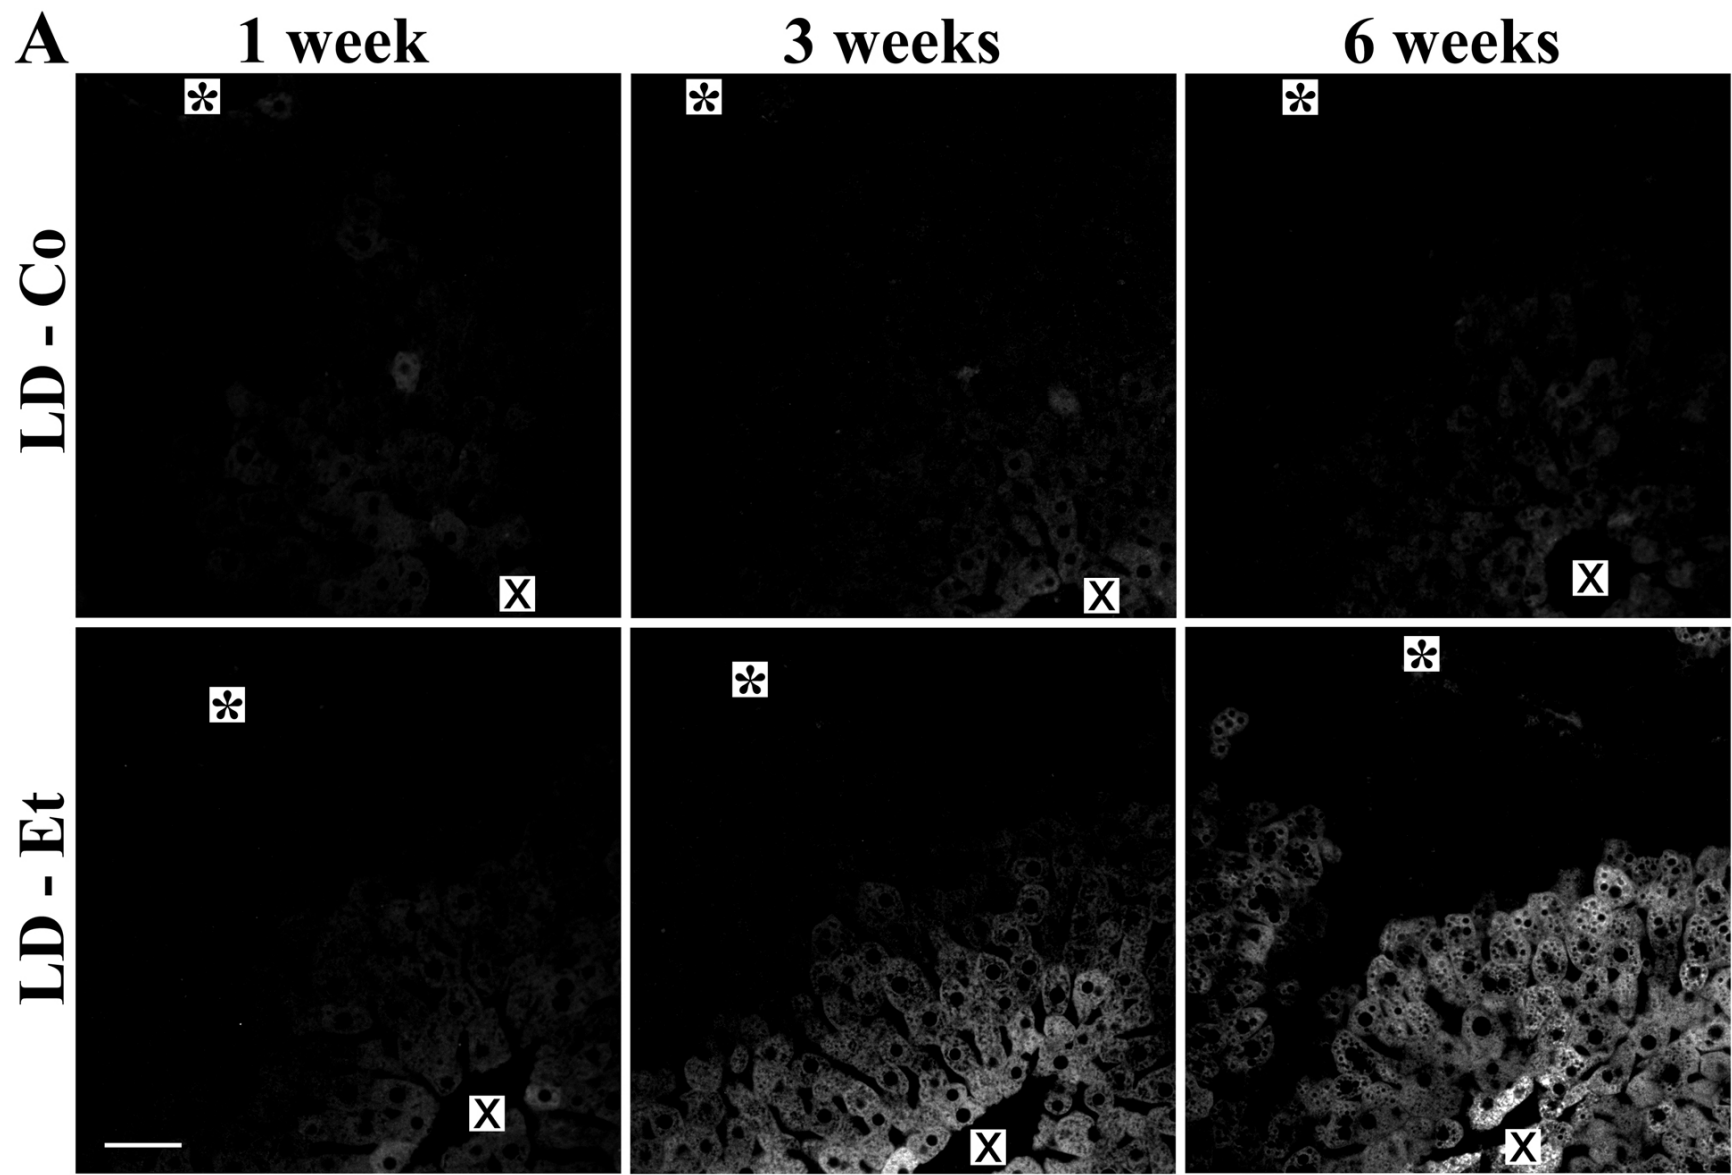

Supplemental Figure 9

Supplement: NIHMS605819-supplement-Supplementary_Figure_9_.pdf [file NIHMS605819-supplement-Supplementary_Figure_9_.pdf]
